# Supplementary material
Source: HighWire-hosted journal article supplement (https://jnm.snmjournals.org/highwire/filestream/94164/field_highwire_adjunct_files/0/jnm074914_Supplemental_Tables.pdf)
Supplement: jnm074914_Supplemental_Tables.pdf [file jnm074914_Supplemental_Tables.pdf]

**Supplemental Table 1.** Biodistribution in Rip1Tag2 mice at 0.5, 1, 2 and 4 h after injection of [Lys<sup>40</sup>(Ahx-DOTA-<sup>68</sup>Ga)NH<sub>2</sub>]-exendin-4.

| Organ      | 0.5 h     | 1 h       | 2 h       | 4 h       |
|------------|-----------|-----------|-----------|-----------|
| Lungs*     | 4.29±0.77 | 4.58±1.03 | 3.18±0.23 | 3.43±0.29 |
| Pancreas*  | 2.22±0.81 | 2.05±0.43 | 1.73±1.45 | 1.87±0.38 |
| Stomach*   | 0.33±0.06 | 0.32±0.07 | 0.23±0.04 | 0.21±0.05 |
| Tumor*     | 1.77±0.67 | 2.05±0.87 | 1.88±0.52 | 1.89±0.41 |
| Kidneys    | 63.8±2.9  | 70.8±6.0  | 66.1±1.5  | 60.0±6.8  |
| Liver      | 1.24±0.06 | 0.86±0.15 | 0.88±0.16 | 0.53±0.13 |
| Spleen     | 0.14±0.05 | 0.13±0.03 | 0.15±0.03 | 0.13±0.02 |
| Red marrow | 1.24±0.29 | 0.80±0.10 | 0.29±0.02 | 0.17±0.06 |

The results are expressed as %IA/organ (mean ± SD) and are decay corrected, n ≥ 3  
 \*GLP-1 receptor positive organs

**Supplemental Table 2.** Biodistribution in Rip1Tag2 mice at 0.5, 2, 4 and 18 h after injection of [Lys<sup>40</sup>(Ahx-HYNIC-<sup>99m</sup>Tc/EDDA)NH<sub>2</sub>]-exendin-4.

| Organ      | 0.5 h     | 2 h       | 4 h       | 18 h      |
|------------|-----------|-----------|-----------|-----------|
| Lungs*     | 1.79±0.54 | 2.03±0.72 | 2.28±0.73 | 0.64±0.36 |
| Pancreas*  | 1.08±0.49 | 0.87±0.26 | 0.98±0.33 | 0.63±0.28 |
| Stomach*   | 0.11±0.04 | 0.13±0.06 | 0.12±0.06 | 0.11±0.05 |
| Tumor*     | 0.63±0.21 | 0.72±0.34 | 0.69±0.33 | 0.41±0.25 |
| Kidneys    | 18.7±2.0  | 17.7±0.8  | 18.5±1.8  | 12.2±1.1  |
| Liver      | 1.16±0.28 | 1.00±0.39 | 1.03±0.26 | 0.94±0.19 |
| Spleen     | 0.05±0.01 | 0.03±0.01 | 0.04±0.26 | 0.03±0.02 |
| Red marrow | 1.34±0.47 | 0.45±0.07 | 0.20±0.07 | 0.10±0.02 |

The results are expressed as %IA/organ (mean ± SD) and are decay corrected, n ≥ 3  
 \*GLP-1 receptor positive organs

**Supplemental Table 3.** Biodistribution in Rip1Tag2 mice at 1, 4, 12, 36, 84 and 168 h after injection of [Lys<sup>40</sup>(Ahx-DOTA-<sup>111</sup>In)NH<sub>2</sub>]-exendin-4.

| Organ      | 1 h       | 4 h       | 12 h      | 36 h      | 84 h      | 168 h     |
|------------|-----------|-----------|-----------|-----------|-----------|-----------|
| Lungs*     | 7.40±0.22 | 4.22±0.53 | 1.08±0.08 | 0.78±0.15 | 0.49±0.07 | 0.13±0.05 |
| Pancreas*  | 2.23±0.05 | 3.10±1.05 | 1.54±0.56 | 1.38±0.77 | 0.6±90.14 | 0.54±0.18 |
| Stomach*   | 0.38±0.06 | 0.36±0.12 | 0.13±0.04 | 0.12±0.02 | 0.08±0.01 | 0.07±0.04 |
| Tumor*     | 3.45±1.8  | 1.92±1.4  | 0.88±0.68 | 1.02±0.74 | 0.37±0.33 | 0.38±0.19 |
| Kidneys    | 66.9±2.6  | 64.2±2.3  | 63.4±6.3  | 43.2±2.4  | 20.7±1.4  | 11.7±2.3  |
| Liver      | 1.37±0.13 | 1.44±0.16 | 1.31±0.34 | 1.08±0.31 | 0.67±0.06 | 0.47±0.08 |
| Spleen     | 0.12±0.01 | 0.12±0.02 | 0.11±0.01 | 0.07±0.01 | 0.04±0.01 | 0.03±0.01 |
| Red marrow | 0.44±0.13 | 0.19±0.11 | 0.14±0.04 | 0.07±0.01 | 0.03±0.01 | 0.02±0.01 |

The results are expressed as %IA/organ (mean ± SD) and are decay corrected, n ≥ 3  
 \*GLP-1 receptor positive organs
